# Supplementary figures and images for: Physical Activity Patterns among Individuals with Prediabetes or Type 2 Diabetes across Two Years—A Longitudinal Latent Class Analysis
Source: MDPI journal article supplement (doi:10.3390/ijerph19063667), 2022-03-19

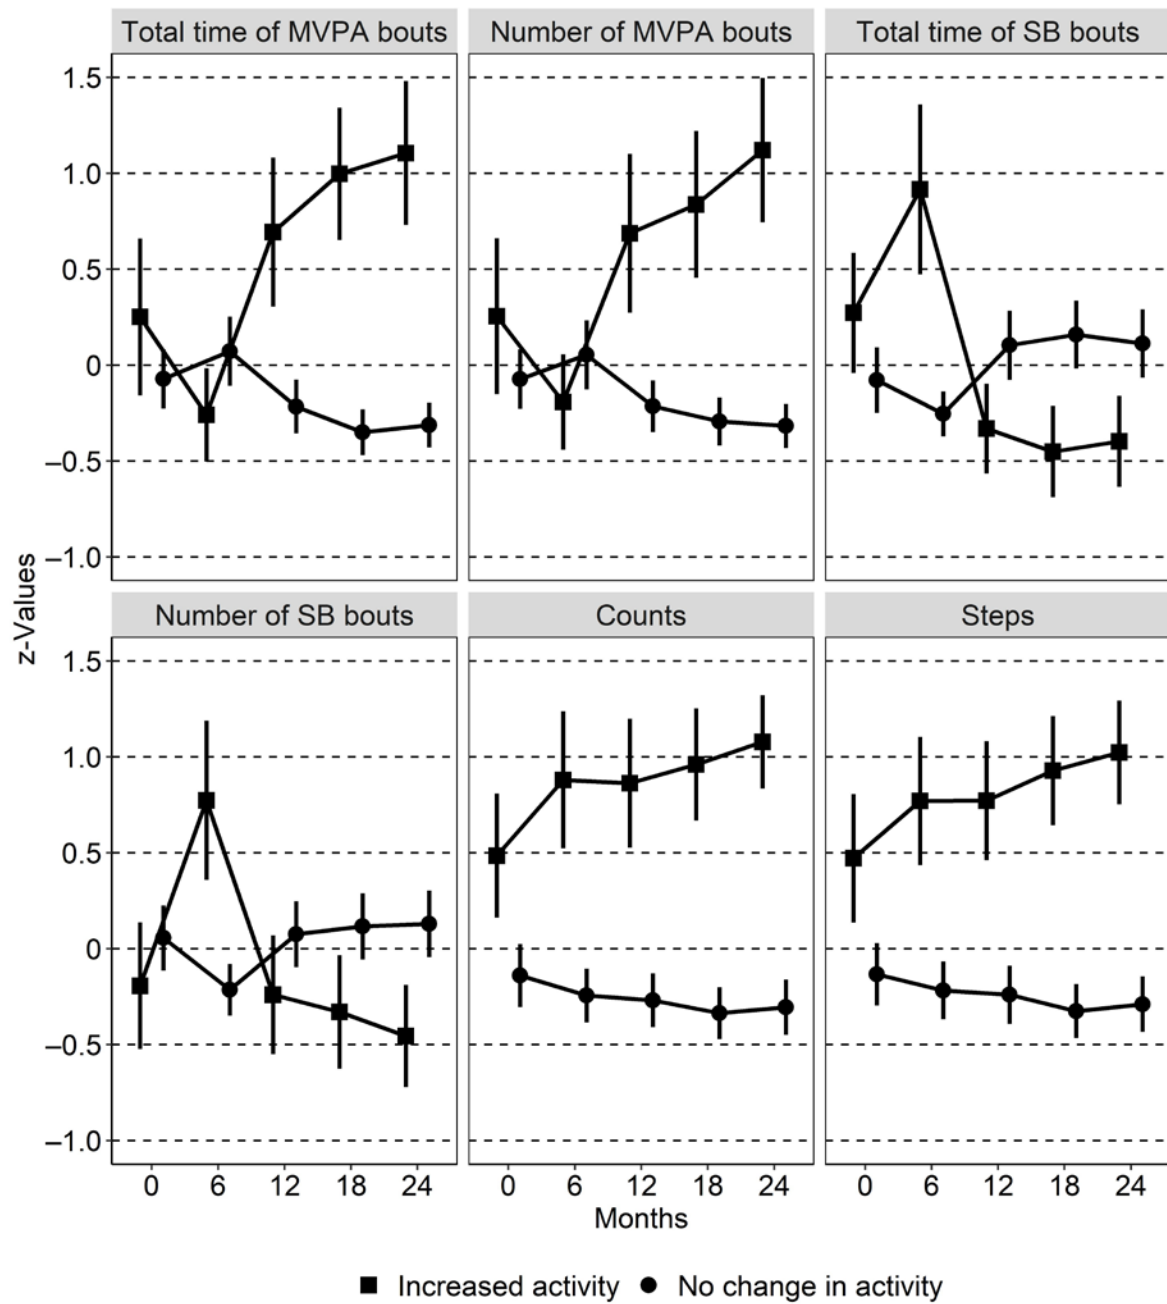

Figure S1.

Supplement: s1 [file s1]
